# Supplementary material
Source: ML conference proceedings conference paper supplement (https://openaccess.thecvf.com/content/CVPR2022/html/Wei_Self-Supervised_Neural_Articulated_CVPR_2022_paper.html)
Supplement: Supplementary file 2 [file Wei_Self-Supervised_Neural_Articulated_CVPR_2022_supplemental.zip]

Archive with 2 entries (2 files):
- 06651-supp/06651-supp.pdf
- 06651-supp/supplementary-video480.mov
